1 **A Data-Driven Transcriptional Taxonomy of Adipogenic Chemicals to Identify Emerging**  
2 **Metabolic Health Threats**

3

4 Stephanie Kim,<sup>\*1,2</sup> Eric Reed,<sup>\*1,3</sup> Stefano Monti,<sup>#1,3</sup> Jennifer Schlezinger<sup>#1,2</sup>

5 \*Co-first authors

6 #Co-senior authors

7

8 <sup>1</sup>Boston University Superfund Research Program, Boston University, MA 02118 USA

9 <sup>2</sup>Boston University School of Public Health, Department of Environmental Health, MA 02118  
10 USA

11 <sup>3</sup>Boston University School of Medicine, Department of Computational Medicine, MA 02118 USA

12

13

14

15

16 **Corresponding author:**

17 Jennifer J. Schlezinger, Ph.D.

18 Boston University School of Public Health

19 Dept. of Environmental Health

20 715 Albany Street, R-405

21 Boston, MA 02118

22 Phone: 617-638-6497

23 Email: [jschlezi@bu.edu](mailto:jschlezi@bu.edu)

24

25 **Running Title:**

26 Classification Taxonomy for Adipogenic Chemicals

27

28 **Acknowledgements:**

29

30 **Declaration of competing financial interests (CFI):**

31 The authors declare they have no actual or potential competing financial interests.

32

33 **Grant Information:**

34 Superfund Research Program [P42 ES007381]

35 BU-Joslin Pilot & Feasibility Program Award (2016)

36

37

38

39

40

41 **Abstract:**

42 **Background:** Growing evidence suggests that chemicals in disparate structural classes  
43 activate specific subsets of PPAR $\gamma$ 's transcriptional programs to generate adipocytes with  
44 distinct phenotypes.

45  
46 **Objectives:** Our objectives were to 1) establish a novel classification method to predict PPAR $\gamma$ -  
47 interacting and modifying chemicals, and 2) create a taxonomy to group chemicals based on  
48 their effects on PPAR $\gamma$ 's transcriptome and adipocyte phenotype. We tested the hypothesis that  
49 environmental ligands highly ranked by the taxonomy, but that segregated from the therapeutic  
50 ligands, would induce white but not brite adipogenesis.

51  
52 **Methods:** 3T3-L1 cells were differentiated in the presence of 76 chemicals (negative controls,  
53 nuclear receptor ligands known to influence adipocyte biology, suspected environmental PPAR $\gamma$   
54 ligands). Differentiation was assessed by measuring lipid accumulation. mRNA expression was  
55 determined by multiplexed RNA-Seq and validated by RT-qPCR. A novel classification model  
56 was developed using an amended random forest procedure tailored to the experimental design.  
57 A subset of environmental contaminants identified as strong PPAR $\gamma$  agonists were  
58 characterized for lipid handling, mitochondrial biogenesis and cellular respiration in mouse and  
59 human adipocyte models.

60  
61 **Results:** The 76 chemicals generated a spectrum of adipogenic differentiation. We used lipid  
62 accumulation and RNA sequencing data to develop a classification system that 1) identified  
63 PPAR $\gamma$  agonists, and 2) sorted agonists into likely white or brite adipogens. Expression of *Cidec*  
64 was the most efficacious indicator of strong PPAR $\gamma$  activation. Two known environmental  
65 PPAR $\gamma$  ligands, tetrabromobisphenol A and triphenyl phosphate, which sorted distinctly from  
66 therapeutic ligands, induced white but not brite adipogenesis. Moreover, two chemicals were  
67 identified as highly ranked PPAR $\gamma$  agonists, tonalide and quinoxifen, induced white  
68 adipogenesis without concomitant health-promoting effects in 3T3-L1 cells and primary human  
69 preadipocytes.

70  
71 **Discussion:** A novel classification procedure accurately identified environmental chemicals as  
72 PPAR $\gamma$ -modifying chemicals distinct from known PPAR $\gamma$ -modifying therapeutics. The developed  
73 framework also has general applicability to the classification of as-yet uncharacterized  
74 chemicals.

75  
76  
77  
78  
79  
80  
81  
82

## 83 **Introduction:**

84 Since 1980, the prevalence of obesity has been increasing globally and has doubled in more  
85 than 70 countries. In 2015, it was estimated that a total of 108 million children and 604 million  
86 adults were obese worldwide (Collaborators et al. 2017). This poses a major public health threat  
87 since overweight and obesity increase the risk of metabolic syndrome, which, in turn, sets the  
88 stage for metabolic diseases, such as type 2 diabetes, cardiovascular disease, nonalcoholic  
89 fatty liver disease and stroke (Park et al. 2003). The Endocrine Society's latest scientific  
90 statement on the obesity pathogenesis states that obesity is a disorder of the energy  
91 homeostasis system, rather than just a passive accumulation of adipose, and that  
92 environmental factors, including chemicals, confer obesity risk (Schwartz et al. 2017). The rapid  
93 increases in obesity and metabolic diseases correlate with substantial increases in  
94 environmental chemical production and exposures over the last few decades, and experimental  
95 evidence in animal models demonstrates the ability of a broad spectrum of chemicals to induce  
96 adiposity and metabolic disruption (Heindel et al. 2017).

97  
98 Adipocytes are crucial for maintaining metabolic homeostasis as they are repositories of free  
99 fatty acids and release hormones that can modulate body fat mass (Rosen and Spiegelman  
100 2006). Adipogenesis is a highly regulated process that involves a network of transcription  
101 factors acting at different time points during differentiation (Farmer 2006) Peroxisome  
102 proliferator activated receptor  $\gamma$  (PPAR $\gamma$ ) is a ligand activated, nuclear receptor and essential  
103 regulator of adipocyte formation and function (Tontonoz et al. 1994), as well as metabolic  
104 homeostasis, as all PPAR $\gamma$  haploinsufficient and KO models present with lack of adipocyte  
105 formation and metabolic disruption (Gumbilai et al. 2016; He et al. 2003; Jiang et al. 2014;  
106 O'Donnell et al. 2016; Zhang et al. 2004).

107  
108 PPAR $\gamma$  activation regulates energy homeostasis by both stimulating storage of excess energy  
109 as lipids in white adipocytes and stimulating energy utilization by triggering mitochondrial  
110 biogenesis, fatty acid oxidation and thermogenesis in white and brown adipocytes. The white  
111 adipogenic, white/brown adipogenic and insulin sensitizing activities of PPAR $\gamma$  are regulated  
112 separately through post-translational modifications (Banks et al. 2015; Choi et al. 2010; Choi et  
113 al. 2011; Qiang et al. 2012) and differential co-regulator recruitment, (Burgermeister et al. 2006;  
114 Feige et al. 2007; Ohno et al. 2012; Villanueva et al. 2013). Rapid expansion of white adipose  
115 depots and adipocyte hypertrophy that outpace vascularization generates hypoxic conditions  
116 that trigger the inflammation, fibrosis and lipotoxicity that contribute to the development of  
117 metabolic syndrome (Kusminski et al. 2016). Importantly, humans with minimal white adipocyte  
118 populations are at higher risk for obesity and type 2 diabetes. (Clausnitzer et al. 2015; Sidossis  
119 and Kajimura 2015; Timmons and Pedersen 2009).

120  
121 Growing evidence supports the hypothesis that environmental PPAR $\gamma$  ligands induce  
122 phenotypically distinct adipocytes. Tributyltin (TBT) induces the formation of an adipocyte with  
123 reduced adiponectin expression and altered glucose homeostasis (Regnier et al. 2015).  
124 Furthermore, TBT fails to induce expression of genes associated with browning of adipocytes  
125 (e.g. *Ppara*, *Pgc1a*, *Cidea*, *Elovl3*, *Ucp1*) in differentiating 3T3-L1 adipocytes (Kim et al. 2018;  
126 Shoucri et al. 2018). As a result, TBT-induced adipocytes fail to upregulate mitochondrial

127 biogenesis and have low levels of cellular respiration (Kim et al. 2018; Shoucri et al. 2018). The  
128 structurally similar environmental PPAR $\gamma$  ligand, triphenyl phosphate, also fails to induce brite  
129 adipogenesis, and this correlates with an inability to prevent PPAR $\gamma$  from being phosphorylated  
130 at S273 (Schlezing 2018).

131  
132 The EPA developed the Toxicity Forecaster (ToxCast<sup>TM</sup>) program to use high-throughput  
133 screening assays to prioritize chemicals and inform regulatory decisions regarding thousands of  
134 environmental chemicals (Kavlock et al. 2012). Several ToxCast<sup>TM</sup> assays can measure the  
135 ability of chemicals to bind to or activate PPAR $\gamma$ , and these assays have been used to generate  
136 a toxicological priority index (ToxPi) that were expected to predict the adipogenic potential of  
137 chemicals in cell culture models (Auerbach et al. 2016). Yet, it has been shown that the results  
138 of ToxCast<sup>TM</sup> PPAR $\gamma$  assays do not always correlate well with activity measured in a laboratory  
139 setting and that the ToxPi designed for adipogenesis was prone to predicting false positives  
140 (Janesick et al. 2016). Furthermore, the ToxCast/ToxPi approach cannot distinguish between  
141 white and brite adipogens.

142  
143 Here, we present phenotypic and transcriptomic data from adipocytes differentiated in the  
144 presence of 76 different chemicals. We combined the cost-effective generation of agonistic  
145 transcriptomic data by the novel highly multiplexed RNA-Seq technology 3'Digital Gene  
146 Expression with a new classification method to predict PPAR $\gamma$ -interacting and modifying  
147 chemicals. Further, we investigated metabolism-related outcome pathways as effects of the  
148 chemical exposures. We created a data-driven taxonomy to specifically classify chemicals into  
149 distinct categories based on their various interactions with and effects on PPAR $\gamma$ . Based on the  
150 taxonomy-based predictions, we tested the phenotype (white vs. brite adipocyte functions) of  
151 environmental adipogens predicted to fail to induce brite adipogenesis in 3T3 L1 cells and  
152 primary human adipocytes.

153

154

## 155 **Methods:**

### 156 ***Chemicals***

157 DMSO was purchased from American Bioanalytical (Natick, MA). CAS numbers, sources and  
158 catalog numbers of experimental chemicals are provided in Table S1. Human insulin,  
159 dexamethasone, 3-isobutyl-1-methylxanthine (IBMX), and all other chemicals were from Sigma-  
160 Aldrich (St. Louis, MO) unless noted.

161

### 162 ***Cell Culture***

163 NIH 3T3-L1 (ATCC: CL-173, RRID:CVCL\_0123) pre-adipocytes were maintained in high-  
164 glucose DMEM with 10% calf serum, 100 U/ml penicillin, 100  $\mu$ g/ml streptomycin, 0.25  $\mu$ g/ml  
165 amphotericin B. Cells were plated in maintenance for experiments and incubated for 4 days.  
166 "Naïve" cells were cultured in maintenance medium for the duration of an experiment. To induce  
167 adipogenesis, the medium was replaced with DMEM containing 10% fetal bovine serum (FBS,  
168 Sigma-Aldrich), 250 nM dexamethasone, 167 nM human insulin, 0.5 mM IBMX, 100 U/ml  
169 penicillin, and 100  $\mu$ g/ml streptomycin. Experimental wells received induction medium and were  
170 treated with Vh (DMSO, 0.2% final concentration) or test chemicals at concentrations indicated

171 in Table S1. On days 3 and 5 of differentiation, medium was replaced with adipocyte  
172 maintenance medium (DMEM, 10% FBS, 167 nM human insulin, 100 U/ml penicillin, 100 µg/ml  
173 streptomycin), and the cultures were re-dosed. On Day 7 of differentiation, medium was  
174 replaced with adipocyte medium (DMEM, 10% FBS, 100 U/ml penicillin, 100 µg/ml  
175 streptomycin), and the cultures were re-dosed. On day 10, cytotoxicity was assessed by  
176 microscopic inspection, with cultures containing more than 10% rounded cells excluded from  
177 consideration. Healthy cells were harvested for analysis of gene expression, lipid accumulation,  
178 fatty acid uptake, mitochondrial biogenesis, mitochondrial membrane potential, and cellular  
179 respiration.

180  
181 Primary human subcutaneous pre-adipocytes were obtained from the Boston Nutrition Obesity  
182 Research Center (Boston, MA). The pre-adipocytes were maintained in αMEM with 10% FBS,  
183 100 U/ml penicillin, 100 µg/ml streptomycin, 0.25 µg/ml amphotericin B. Pre-adipocytes were  
184 plated in maintenance medium for experiments and incubated for 3 days. “Naïve” cells were  
185 cultured in maintenance medium for the duration of an experiment. To induce adipogenesis, the  
186 medium was replaced with DMEM/F12, 25 mM NaHCO<sub>3</sub>, 100 U/ml penicillin, 100 µg/ml  
187 streptomycin, 33 µM d-Biotin, 17 µM pantothenate, 100 nM dexamethasone, 100 nM human  
188 insulin, 0.5 mM IBMX, 2 nM T<sub>3</sub>, and 10 µg/ml transferrin. Experimental wells received induction  
189 medium and were treated with vehicle (0.1% DMSO), tonalide, or quinoxifen (4 µM)). On day 3  
190 of differentiation, medium was replaced with induction medium, and the cultures were re-dosed.  
191 On days 5, 7, 10, and 12 of differentiation, the medium was replaced with adipocyte medium  
192 (DMEM/F12, 25 mM NaHCO<sub>3</sub>, 100 U/ml penicillin, 100 µg/ml streptomycin, 33 µM d-Biotin, 17  
193 µM pantothenate, 10 nM dexamethasone, and 10 nM insulin), and the cultures were re-dosed.  
194 Following 14 days of differentiation and dosing, cells were harvested for analysis of gene  
195 expression, lipid accumulation, fatty acid uptake, mitochondrial biogenesis, and cellular  
196 respiration.

197

### 198 ***Transcriptome Analysis***

199 3T3-L1 cells were plated in 24 well plates at 50,000 cells per well in 0.5 ml maintenance  
200 medium at initiation of the experiment and then cultured as described above. Total RNA was  
201 extracted and genomic DNA was removed using the Direct-zol MagBead RNA Kit (Zymo  
202 Research, Orange, CA). A final concentration of 5 ng RNA/ul was used for each sample (n = 6  
203 for naïve, n = 3-4 per Vh or chemical) across six 96 well plates. Sequencing and gene  
204 expression quantification was carried out by the Broad Institute (Cambridge, MA). RNA was  
205 sequenced using highly multiplexed 3' Digital Gene Expression (3' DGE, (Xiong et al. 2017)).  
206 Only instances of uniquely aligned reads were quantified, i.e., reads that aligned to only one  
207 transcript. Furthermore, multiple reads with the same UMI, aligning to the same gene were  
208 quantified as a single count.

209

### 210 ***Gene Expression Data Preprocessing***

211 All analyses of gene expression data was carried out in R v3.4.3 (Team 2013). The number of  
212 counted reads per samples varied widely with a range of 7.9E1 to 2.27E6 (Mean = 2.25E5, SD  
213 = 2.94E5). To determine threshold of acceptable sample level quantification, we performed an  
214 iterative clustering-based approach to determine sets of low expression outlier samples. Each



215 iteration included four steps: removal of low count genes, normalization, plate-level batch  
216 correction, and hierarchical clustering. Low count genes were defined as genes with mean  
217 counts < 1 across all samples. Normalization was performed using Trimmed mean of M-values,  
218 the default method employed by *limma* v3.34.9 (Ritchie et al. 2015). Batch correction was  
219 performed by *ComBat* v3.26.0 (Leek et al. 2012). Hierarchical clustering was performed on the  
220 3000 genes with the largest median absolute deviation (MAD) score, using Euclidean distance  
221 and 1-Pearson correlation as the distance metric for samples and genes, respectively, as well  
222 as Ward's agglomerative method. Clusters of samples clearly representative of low expression  
223 quantification were removed. This process was repeated until no low expression outlier sample  
224 was present (four iterations). For the remaining samples, once again low count genes were  
225 removed and samples were normalized and batch corrected by the same procedure. The final  
226 data set includes 9,616 genes across 234 samples.

227

### 228 ***PPAR $\gamma$* Modifier Classification**

229 A classification model was inferred from the *training set* consisting of 38 known PPAR $\gamma$ -  
230 modifying compounds and 22 known non-PPAR $\gamma$  modifying compounds, including vehicle, to  
231 predict the label of the *test set* of 17 suspected PPAR $\gamma$ -modifying compounds. The model  
232 inference was based on an amended random forest procedure developed to better account for  
233 the presence of biological replicates in the data (manuscript in preparation). Specifically, for  
234 each classification tree, samples and genes were bagged, such that samples were sampled  
235 with replacement and the square root of the total number of genes were randomly selected.  
236 Within these "bags", replicates of the same chemical exposure were then collapsed to their  
237 mean expression. The random forest classification vote, a number between 0 and 1, was then  
238 computed as the proportion of trees in the forest that assign the sample to the positive class.  
239 Prior to running the random forest procedure, genes were filtered based on within versus  
240 between exposure variance, using ANOVA. Genes with an F-statistics associated with an FDR  
241 corrected p-value < 0.05, were used in the classification procedure. The predictive performance  
242 of the classification approach was estimated using 10-fold cross validation over the training set.  
243 For each fold, samples were stratified at the chemical exposure level, such that each fold  
244 included 6 distinct compounds and a different number of samples, and all replicates of the same  
245 compound were only included in either the training or the test folds. Thresholds for determining  
246 class membership based on voting was determined by running the training folds through the  
247 random forest and selecting the threshold producing the highest F1-score, i.e., the harmonic  
248 mean of precision and sensitivity. Performance was assessed in terms of area under the ROC  
249 curve (AUC), as well as precision, sensitivity, specificity, F1-score, and balanced accuracy, i.e.,  
250 the mean of specificity and sensitivity. All random forests were generated using 2000 decision  
251 trees. The final classification model used to predict the unlabeled chemicals was built using the  
252 full training set of 60 labelled chemicals and 1,199 genes after filtering. The performance of this  
253 procedure was compared to three alternative random forest strategies. In the first, denoted as  
254 pre-merge, the mean gene expression across replicates is computed, and a classic random  
255 forest is applied to the classification of each merged chemical profile. In the second, denoted as  
256 classic, replicate samples are treated as independent perturbations and classified based on a  
257 classic random forest. Finally, in the third, denoted as pooled, the mean of votes across  
258 replicates from the previous strategy are used to estimate class membership per compound. To

259 compare the performance of each strategy, the 10-fold CV procedure applied to the training set  
260 was repeated 10-times to generate a distribution of performance statistics. The importance of  
261 each gene in each random forest model was measured using the gini importance measure  
262 (Breiman 2001).

263

### 264 ***PPAR $\gamma$ Activity Modifier Clustering***

265 Known and suspected PPAR $\gamma$  modifiers were clustered based on their test statistics from  
266 univariate analysis comparing each chemical or naive exposure to vehicle using *limma* v3.34.9.  
267 In order to assess taxonomic differences between different exposure outcomes, a recursive  
268 clustering procedure, which we refer to as “K2 clustering”, was developed, whereby a set of  
269 chemicals is iteratively split into two subgroups. At each iteration of the procedure, the genes  
270 with the top 10% of the sum of squared test statistics across all samples within the current set  
271 are selected. Samples are then clustered using Euclidean distance and Ward’s agglomerative  
272 method, and are split into two clusters using the cutree R function. The procedure is then  
273 recursively applied to each of the two clusters, until the two-cluster split would result in a single  
274 chemical in the terminal subgroup. To obtain and measure the most stable clusters, each  
275 iteration was bootstrapped 200 times by resampling gene-level statistics with replacement. The  
276 most common clusters were used, and the proportion of total bootstrapping iterations that  
277 included these identical clustering assignments was reported. At each step, all clusters must  
278 include at least non-vehicle exposures.

279

280 In order to derive gene-signatures of each split, differential analysis was performed between  
281 samples from compounds of either cluster at a split. In these models, biological replicate status  
282 was accounted for using the duplicate correlation procedure in the *limma* package. From these  
283 models, signatures of genes assigned to either the two subgroups were generated based on  
284 two criteria. First, for a particular gene, the difference between mean expression between the  
285 two groups must have  $|\log_2(\text{Fold-Change})| > 1$  and an FDR Q-value  $< 0.1$ . Each gene is then  
286 assigned to either of the two subgroups based on the mean of their test statistics from the  
287 comparison of each chemical to vehicle, i.e., a gene is assigned to a subgroup with maximum  
288 absolute value of the mean of these test statistics. This yielded four gene sets per split,  
289 pertaining to both subgroup assignment and direction. Functional enrichment, comparing these  
290 gene sets to independently annotated gene sets was carried out via Fisher’s Exact Test. These  
291 gene sets include those of the Gene Ontology Biological Processes gene set compendia  
292 downloaded from MSigDB (c5.bp.v6.2.symbols.gmt), as well two gene sets derived from  
293 publicly available microarray expression data from an experiment using mouse embryonic  
294 fibroblasts to compare wild-type samples with mutant samples that do not undergo  
295 phosphorylation of PPAR $\gamma$  at Ser273, GEO accession number GSE22033 (Choi et al. 2010).  
296 These additional gene sets were comprised of genes, measured to be significantly up- or down-  
297 regulated (FDR Q-Value  $< 0.05$ ) in mutant samples, based on differential analysis of RMA  
298 normalized expression with *limma*.

299

### 300 ***Reverse Transcriptase (RT)-qPCR***

301 Cells were plated in 24 well plates at 50,000 cells per well in 0.5 ml maintenance medium at  
302 initiation of the experiment and then cultured as described above. Total RNA was extracted and

303 genomic DNA was removed using the 96-well Direct-zol MagBead RNA Kit (Zymo Research).  
304 cDNA was synthesized from total RNA using the iScript™ Reverse Transcription System  
305 (BioRad, Hercules, CA). All qPCR reactions were performed using the PowerUp™ SYBR Green  
306 Master Mix (Thermo Fisher Scientific, Waltham, MA). The qPCR reactions were performed  
307 using a 7500 Fast Real-Time PCR System (Applied Biosystems, Carlsbad, CA): UDG activation  
308 (50°C for 2 min), polymerase activation (95°C for 2 min), 40 cycles of denaturation (95°C for 15  
309 sec) and annealing (various temperatures for 15 sec), extension (72°C for 60 sec). The primer  
310 sequences and annealing temperatures are provided in Table S2. Relative gene expression  
311 was determined using the Pfaffl method to account for differential primer efficiencies (Pfaffl  
312 2001), using the geometric mean of the Cq values for beta-2-microglobulin (*B2m*) and 18s  
313 ribosomal RNA (*Rn18s*) for mouse gene normalization and of ribosomal protein L27 (*RPL27*)  
314 and *B2M* for human gene normalization. The Cq value from naïve, undifferentiated cultures was  
315 used as the reference point. Data are reported as “Relative Expression.”

316

### 317 ***Lipid Accumulation***

318 Cells were plated in 24 well plates at 50,000 cells per well in 0.5 ml maintenance medium at  
319 initiation of the experiment and then cultured as described above. Medium was removed from  
320 the differentiated cells, and they were rinsed with PBS. The cells were then incubated with Nile  
321 Red (1 µg/ml in PBS) for 15 min in the dark. Fluorescence ( $\lambda_{ex}$ = 485 nm,  $\lambda_{em}$ = 530 nm) was  
322 measured using a Synergy2 plate reader (BioTek Inc., Winooski, VT). The fluorescence in  
323 experimental wells was normalized by subtracting the fluorescence measured in naïve  
324 (undifferentiated) cells and reported as relative fluorescence units (“RFUs”).

325

### 326 ***Mitochondrial Membrane Potential***

327 Cells were plated in 96 well, black-sided plates at 10,000 cells per well in 0.2 ml maintenance  
328 medium at initiation of the experiment and then cultured as described above. Mitochondrial  
329 membrane potential was measured by treating differentiated cells with MitoOrange Dye  
330 according to manufacturer’s protocol (Abcam, Cambridge, MA). Measurement of fluorescence  
331 intensity ( $\lambda_{ex}$ = 485 nm,  $\lambda_{em}$ = 530 nm) was performed using a Synergy2 plate reader. The  
332 fluorescence in experimental wells was normalized by subtracting the fluorescence measured in  
333 naïve (undifferentiated) cells and reported as “RFUs.”

334

### 335 ***Fatty Acid Uptake***

336 Cells were plated in 96 well, black-sided plates at 10,000 cells per well in 0.2 ml maintenance  
337 medium at initiation of the experiment and then cultured as described above. Fatty acid uptake  
338 was measured by treating differentiated cells with 100 µL of Fatty Acid Dye Loading Solution  
339 (Sigma-Aldrich, MAK156). Following a 1 hr incubation, measurement of fluorescence intensity  
340 ( $\lambda_{ex}$ = 485nm,  $\lambda_{em}$ = 530nm) was performed using a Synergy2 plate reader. The fluorescence  
341 in experimental wells was normalized by subtracting the fluorescence measured in naïve  
342 (undifferentiated) cells and reported as fold difference from vehicle “RFUs.”

343

### 344 ***Mitochondrial Biogenesis***

345 Cells were plated in 24 well plates at 50,000 cells per well in 0.5 ml maintenance medium at  
346 initiation of the experiment and then cultured as described above. Mitochondrial biogenesis was



347 measured in differentiated cells using the MitoBiogenesis In-Cell Elisa Colorimetric Kit, following  
348 the manufacturer's protocol (Abcam). The expression of two mitochondrial proteins (COX1 and  
349 SDH) were measured simultaneously and normalized to the total protein content via JANUS  
350 staining. Absorbance (OD 600nm for COX1, OD 405nm for SDH, and OD 595nm for JANUS)  
351 was measured using a BioTek Synergy2 plate reader. The absorbance ratios of COX/SDH in  
352 experimental wells were normalized to the naïve (undifferentiated) cells.

353

### 354 ***Oxygen Consumption***

355 Cells were plated in Agilent Seahorse plates at a density of 50,000 cells per well in 0.5 ml  
356 maintenance medium at initiation of the experiment and then cultured as described above. Prior  
357 to all assays, cell media was changed to Seahorse XF Assay Medium without glucose (1mM  
358 sodium pyruvate, 1mM GlutaMax, pH 7.4) and incubated at 37°C in a non-CO<sub>2</sub> incubator for  
359 30 min. To measure mitochondrial respiration, the Agilent Seahorse XF96 Cell Mito Stress Test  
360 Analyzer (available at BUMC Analytical Instrumentation Core) was used, following the  
361 manufacturer's standard protocol. The compounds and their concentrations used to determine  
362 oxygen consumption rate (OCR) included 1) 0.5 µM oligomycin, 1.0 µM carbonyl cyanide-p-  
363 trifluoromethoxyphenylhydrazone (FCCP) and 2 µM rotenone for 3T3-L1s; and 2) 5 µM  
364 oligomycin, 2.5 µM FCCP, and 10 µM rotenone for the primary human adipocytes.

365

### 366 ***Statistical Analyses***

367 All statistical analyses were performed in R (v 3.4.3) and Prism 7 (GraphPad Software, Inc., La  
368 Jolla, CA). Data are presented as means ± standard error (SE). For 3T3-L1 experiments the  
369 biological replicates correspond to independently plated experiments. For human primary  
370 preadipocyte experiments the biological replicates correspond to distinct individuals'  
371 preadipocytes (3 individuals in all). The qPCR data were log-transformed before statistical  
372 analyses. One-factor ANOVAs (Dunnett's) were performed to analyze the qPCR and phenotypic  
373 data. Sequencing data from 3'DGE have been deposited into GEO (Accession: GSE124564).

374

## 375 **Results**

### 376 ***Development of novel taxonomic subgroups of PPAR $\gamma$ modifiers***

377 Potential adipogens (chemicals that change the differentiation and/or function of adipocytes  
378 including endogenous, natural, therapeutic, synthetic and environmental chemicals) were  
379 identified by review of the literature and based on reports of PPAR $\gamma$  agonism or modulation of  
380 adipocyte differentiation. We also identified chemicals to act as negative controls. Our  
381 classification groups were based on "yes", "no", or "-" of the chemical's potential ability to  
382 interact or modify PPAR $\gamma$  (i.e., to alter its post translational modifications) as noted in the  
383 "PPAR $\gamma$  Modifier" column in Table S1.

384

385 The classic mouse pre-adipocyte model, 3T3-L1 cells, was either maintained in an  
386 undifferentiated state (naive), or differentiated and treated with Vh (0.1% DMSO, final  
387 concentration) or with each of the chemicals (concentrations are reported in Table S1). Lipid  
388 accumulation, indicative of adipocyte differentiation, was determined after 10 days. A spectrum  
389 of adipocyte differentiation was induced (Figure 1). Of the 27 chemicals that significantly  
390 increased adipocyte differentiation, 18 were known PPAR $\gamma$  modifiers and 9 were suspected

391 PPAR $\gamma$  modifiers. Mono(2-ethylhexyl) phthalate (MEHP), SR1664, and 15-deoxy- $\Delta^{12,14}$ -  
392 prostaglandin J2 (15dPGJ2) are PPAR $\gamma$  agonists that were expected to increase adipocyte  
393 differentiation, but did not. LG268 and TBT are RXR agonists that were also expected to  
394 significantly increase adipocyte differentiation, but did not. The 3 chemicals that significantly  
395 downregulated adipocyte differentiation are all known to interact with the retinoic acid receptor.  
396 T007 is a PPAR $\gamma$  antagonist that was expected to decrease adipocyte differentiation, but did  
397 not. The negative controls did not significantly influence adipocyte differentiation. Many of the  
398 suspected PPAR $\gamma$  modifiers did not significantly increase adipocyte differentiation. We  
399 hypothesize that this likely resulted from the fact that we did not apply any chemical above 20  
400  $\mu$ M (with the exception of fenthion), while higher concentrations were used in previous studies.

401  
402 When predicting PPAR $\gamma$  modifying status (“yes” vs. “no”), the mean AUC, precision, sensitivity,  
403 specificity, F1-score, and balanced accuracy from repeated 10-fold cross validation (over the  
404 training set) of the random forest with bag merging procedure was 0.89, 0.90, 0.80, 0.85, 0.85,  
405 and 0.82, respectively (Figure 2A). We observed the most drastic improvement of measured  
406 balanced accuracy, precision, and specificity by the bag merging procedure compared to other  
407 assessed strategies (Figure S1). The first two metrics in particular reflect expectation of  
408 relatively few false positive results compared to the other strategies. In the final model, the  
409 voting threshold that produced the highest F1-score was 0.53. Of the 17 chemicals of unknown  
410 interaction with PPAR $\gamma$ , 13 had random forest vote greater than this value (Table 1). Of these  
411 13 compounds, four had vote > 0.88. These chemicals included quinoxifen, tonalide, allethrin,  
412 and fenthion. Of the 1,199 genes used to train the final classification model, ribosomal protein  
413 L13 (*Rpl13*) and cell death Inducing DFFA Like Effector C (*Cidec*) had the highest measured  
414 Gini Importance (Figure 2B) with *Rpl13* mostly down-regulated and *Cidec* mostly up-regulated  
415 by known PPAR $\gamma$ -modifying compounds (Figure S2). This is consistent with known relationships  
416 between cellular processes and adipogenesis. Specifically, ribosomal machinery is down-  
417 regulated during human adipogenesis (Marcon et al. 2017). *Cidec* is a lipid droplet structural  
418 gene, the expression of which is positively correlated with adipocyte lipid droplet size, insulin  
419 levels, and glycerol release (Ito et al. 2010).

420  
421 The taxonomy derived by the K2 clustering procedure recapitulates many known characteristics  
422 shared by PPAR $\gamma$ -modifying compounds included in this study (Figure 3). For example, three  
423 terminal subgroups are labelled in Figure 3 based on their shared characteristics. These  
424 include: flame retardants (tetrabromobisphenol A (TBBPA) and triphenyl phosphate (TPHP)),  
425 phthalates (MBUP, MEHP, MBZP, and BBZP), and RXR agonists (TBT and LG268).  
426 Interestingly, we observe two subgroups containing all of the four thiazolidinediones, with  
427 rosiglitazone (Rosig) segregating with the non-thiazolidinedione S26948 and pioglitazone, MCC  
428 555, and troglitazone segregating together.

429  
430 All of these terminal subgroups fall within a larger module containing 26 chemicals, highlighted  
431 by expression patterns consistent with increased adipogenic activity including up-regulation of  
432 genes significantly enriched in pathways involved in adipogenesis and lipid metabolism (Soukas  
433 et al. 2001). In addition, these chemicals also demonstrated consistent down-regulation of  
434 extracellular component genes. Up-regulation of extracellular matrix (ECM) genes are known to

435 be associated with obesity (Huber et al. 2007), though to our knowledge down-regulation of  
436 extracellular matrix genes has not been reported as a direct result of exposure to PPAR $\gamma$   
437 agonists in adipocytes. This effect was strongest in cells exposed to thiazolidinediones and  
438 flame retardants, two classes of chemicals well-described to be strong PPAR $\gamma$  agonists (Berger  
439 et al. 1996; Fang et al. 2015; Riu et al. 2011). The subgroup of thiazolidinediones, which also  
440 includes S26948, is highlighted by up-regulation of genes involved in beta-oxidation, the  
441 process by which fatty acids are metabolized. This metabolic process has been previously  
442 observed with Rosig exposure (Benton et al. 2008).

443  
444 The gene expression profiles of the remaining 17 chemicals, including naïve controls,  
445 demonstrate markedly less up-regulation of genes regulated by PPAR $\gamma$ . Of these 17 chemicals,  
446 a subgroup of 8 (BADGE, PrPar, 15dPGJ2, SR1664, METBP, DINP, BuPA, and fenthion)  
447 includes the reference vehicle signature. Compared to the next closest subgroup, expression  
448 profiles of these compounds are characterized by up-regulation of adipogenesis related  
449 pathways indicative of modest PPAR $\gamma$  agonism. Additionally, a subgroup comprised of 9CRA,  
450 DBT, LG754, ATRA, and the naïve exposure signatures is characterized by down-regulation of  
451 genes involved in adipogenesis and lipid metabolism, indicating repression of PPAR $\gamma$  activity.  
452 Interestingly, both protectin D1 (Prote) and resolvin E1 (Resol) cluster closely in a subgroup with  
453 the CDK inhibitor, roscovitine (Rosco), which is known to induce insulin sensitivity and brite  
454 adipogenesis (Wang et al., 2016).

455  
456 In summary, our top-down clustering approach elucidates subgroups of PPAR $\gamma$  activity  
457 modifying compounds, characterized by differential transcriptomic activity at each split.  
458 Annotation of these transcriptomic signatures reveals clear differences in the set and magnitude  
459 of perturbations to known adipocyte biological processes by subgroups of chemicals.  
460 Membership of these subgroups confirms many expectations, such as subgroups comprised of  
461 solely of phthalates, thiazolidinediones, or flame retardants. The novel observation that the  
462 transcriptomic patterns induced by Resol and Prote segregate with the CDK5 inhibitor Rosco,  
463 suggests that Resol and Prote may modify PPAR $\gamma$  phosphorylation and activation distinctly from  
464 synthetic PPAR $\gamma$  ligands.

#### 465 466 ***Adipogen portal***

467 Given the breadth of results generated by this analysis, this description is far from exhaustive.  
468 As such, we have created an interactive website (<https://montilab.bu.edu/Adipogen/>) to support  
469 the interactive exploration of these results at both the gene and pathway-level. The portal is  
470 built around a point-and-click dendrogram of the clustering results as in Figure 3. Selecting a  
471 node of this dendrogram will populate the rest of the portal with the chemical lists, differential  
472 analysis, and pathway level hyper-enrichment results for each subgroup defined by a split. For  
473 instance, selecting node “H” will show the chemicals in each subgroup to the right (Group 1 =  
474 Honokiol, T007907; Group 2 = Prote, Resol, and Rosco), as well as the differential gene  
475 signature for each group below. Selecting *Cidec*, the top gene in the Group 2 signature, displays  
476 hyper-enrichment results for gene sets which include *Cidec* and have a nominal p-value < 0.50.  
477 The hyper-enrichment results for all genes can be found below this table. Finally, selecting a

478 gene set name will display the gene set members at the bottom frame of the portal, with gene  
479 hits in bold. All tables are queryable and downloadable.

480

### 481 ***Investigation of the white and brite adipocyte taxonomy***

482 We aimed to better assess how the distinction between gene expression patterns translated into  
483 functional differences in the induced adipocytes. Therefore, we selected chemicals from  
484 representative groups related to PPAR $\gamma$  modification for genotypic and phenotypic  
485 characterization. We compared a strong PPAR $\gamma$  therapeutic agonist that also modifies PPAR $\gamma$   
486 phosphorylation (Rosig), a chemical that modifies only PPAR $\gamma$  phosphorylation (Rosco), a weak  
487 PPAR $\gamma$  agonist and endogenous molecule (15dPGJ2) and two known environmental PPAR $\gamma$   
488 ligands (TBBPA and TPhP). 3T3-L1 cells were either maintained in an undifferentiated state  
489 (naive) or differentiated and treated with Vh (0.1% DMSO, final concentration), Rosig (1  $\mu$ M),  
490 Rosco (4  $\mu$ M), 15dPGJ2 (1  $\mu$ M), TBBPA (20  $\mu$ M) and TPhP (10  $\mu$ M). Gene expression and  
491 phenotype were determined after 10 days. Analysis of mitochondrial membrane potential  
492 confirmed that the concentrations used were not toxic (Figure S3A).

493

494 The balance of white and brite adipogenesis is controlled by PPAR $\gamma$ , and the balance is skewed  
495 toward brite adipogenesis by recruitment of specific coactivators to PPAR $\gamma$  (e.g., PGC1 $\alpha$  and  
496 PRDM16)(Chrisman et al. 2018; Puigserver et al. 1998; Qiang et al. 2012; Seale et al. 2007). As  
497 expected, all of the PPAR $\gamma$  agonists (Rosig, 15dPGJ2, TBBPA, TPhP) significantly increased  
498 *Pparg* expression, while Rosco did not (Figure 4A). Similarly, the PPAR $\gamma$  agonists induced  
499 expression of adipocyte genes common to all adipocytes (*Plin*, *Fabp4*, *Cidec*), while roscovitine  
500 did not (Figure 4B). In contrast, only the chemicals known to prevent phosphorylation of PPAR $\gamma$   
501 at S273 (i.e., Rosig and Rosco) induced expression of *Pgc1a* (Figure 4A) and induced  
502 expression of brite adipocyte genes (*Cidea*, *Elovl3*)(Figure 4C). Rosig, Rosco, and 15dPGJ2  
503 induced the expression of *Adipoq* (Figure 4C). In order for brite adipocytes to catabolize fatty  
504 acids and expend excess energy, they must upregulate expression of  $\beta$ -oxidation genes and  
505 mitochondrial biogenesis. In line with their browning capacity, Rosig and Rosco upregulated  
506 expression of *Ppara* and the mitochondrial marker gene *Acaa2* (Figure 4D). Furthermore, only  
507 Rosig and Rosco strongly upregulated *Ucp1*, the protein product of which dissociates the  
508 H<sup>+</sup> gradient the mitochondrial electron transport chain creates from ATP synthesis (Figure 4D).

509

510 Next, we determined if changes in gene expression correlated with changes in adipocyte  
511 function. Fatty acid uptake by adipocytes is necessary for lipid droplet formation and for removal  
512 of free fatty acids from circulation. Compared to vehicle-treated cells, all of the adipogens  
513 significantly induced fatty acid uptake (Figure 5). In order to increase the utilization of fatty  
514 acids, mitochondrial number and/or function must increase. Only Rosig and Rosco significantly  
515 induced mitochondrial biogenesis, while 15dPGJ2 and the environmental PPAR $\gamma$  agonists had  
516 no effect (Figure 6). Interestingly, Rosig significantly reduced the pH of the culture medium,  
517 suggesting that the rosiglitazone-induced adipocytes were highly energetic (Figure S4).

518

519 Rosig and Rosco, therapeutic PPAR $\gamma$  ligand and PPAR $\gamma$  modifier, respectively, were able to  
520 induce gene expression and metabolic phenotypes related to upregulation of mitochondrial



521 processes and energy expenditure. In comparison, environmental PPAR $\gamma$  ligands (TBBPA and  
522 TPhP) were not able to induce the gene and phenotypic markers of brite adipocytes.

523

### 524 ***Identification of novel adipogens that favor white adipogenesis***

525 Quinoxifen (Quino) and tonalide (Tonal) were two of the environmental chemicals that received  
526 the highest PPAR $\gamma$  modifiers vote and segregated distinctly from the therapeutic ligands  
527 (Table1). Thus, we tested the hypothesis that Quino and Tonal are adipogens that do not induce  
528 gene expression or metabolic phenotypes indicative of healthy energy expenditure or brite  
529 adipogenesis. We tested this hypothesis in the 3T3-L1 model and primary human  
530 preadipocytes. In 3T3-L1 cells, Quino and Tonal significantly induced lipid accumulation (Figure  
531 7a). They significantly increased expression of the white adipocyte marker gene, *Cidec*.  
532 However, Quino failed to significantly increase expression of *Cidea*, the brite adipocyte marker  
533 gene, while Tonal significantly suppressed *Cidea* expression (Figure 7B). Accordingly, Quino  
534 and Tonal increased fatty acid uptake (Figure 7C) but not mitochondrial biogenesis (Figure 7D).  
535 Quino increased maximal cellular respiration, but did not change spare capacity (Figure 7E).  
536 Consistent with the 3T3-L1 results, in human preadipocytes Quino and Tonal significantly  
537 induced lipid accumulation (Figure 8A) and expression of *CIDEA* (Figure 8B). Furthermore,  
538 Quino failed to induce *CIDEA* expression, while Tonal suppressed *CIDEA* expression (Figure  
539 8B). In contrast to 3T3-L1 cells, Quino and Tonal did not increase fatty acid uptake over that  
540 induced by the hormonal cocktail (Figure 8C). However, the reduction in mitochondrial  
541 biogenesis and cellular respiration (Figure 8E) can still explain the ability of these chemicals to  
542 increase lipid accumulation.

543

544 In summary, the combination of random forest classification voting and gene expression  
545 clustering identified two environmental contaminants likely to favor the induction of white  
546 adipocytes. Hypothesis testing carried out with functional analyses confirmed that Quino and  
547 Tonal induce white, but not brite, adipogenesis in both mouse and human preadipocyte models.  
548 Importantly, hypothesis testing can be conducted with readily available cells lines and analytical  
549 reagents.

550

### 551 **Discussion**

552

553 The chemical environment has changed dramatically in the past 40 years, and an epidemic  
554 increase in the prevalence of obesity has occurred over the same time period. Yet, it is still  
555 unclear how chemical exposures may be contributing to adverse metabolic health effects. New  
556 tools are needed not just to identify potential adipogens, but to provide information on the type  
557 of adipocyte that is formed. Here, we have both developed a new analytical framework for  
558 adipogen identification and characterization and tested its utility in hypothesis generation. We  
559 show that adipogens segregate based on distinct patterns of gene expression, which we used to  
560 identify two environmental contaminants for hypothesis testing. Our results support the  
561 conclusion that quinoxifen and tonalide have a limited capacity to induce the health-promoting  
562 effects of mitochondrial biogenesis and brite adipocyte differentiation.

563

564 ***Adipogen taxonomy identifies environmental chemicals that favor white adipogenesis***



565 Of the four compounds predicted with high confidence to modify PPAR $\gamma$  activity, quinoxifen and  
566 tonalide are of particular public health concern. Quinoxifen is among a panel of pesticides with  
567 different chemical structures and modes of action (i.e., zoxamide, spirodiclofen, fludioxonil,  
568 tebupirimfos, forchlorfenuron, flusilazole, acetamiprid, and pymetrozine) that induce  
569 adipogenesis and adipogenic gene expression in 3T3-L1 cells (Janesick et al. 2016).  
570 Quinoxifen is a fungicide widely used to prevent the growth of powdery mildew on grapes  
571 (Duncan et al. 2018). We chose to test tonalide because it was reported to strongly increase  
572 adipogenesis in 3T3-L1 cells, although it was concluded that this response was not due to direct  
573 PPAR $\gamma$  activation (Pereira-Fernandes et al. 2013). Our results differ in this regard. Tonalide  
574 bioaccumulates in adipose tissue of many organisms including humans, and exposure is  
575 widespread because of its common use in cosmetics and cleaning agents (Kannan et al. 2005).  
576 Combined, tonalide and galaxolide constitute 95% of the polycyclic musks used in the EU  
577 market and 90% of that of the US market (HERA 2004).

578  
579 Our results support the conclusion that quinoxifen and tonalide are adipogenic chemicals, likely  
580 to be acting through PPAR $\gamma$ . In clustering analysis, quinoxifen and tonalide were among the  
581 largest subgroup of eight potential strong PPAR $\gamma$  agonists (Figure 3). Notably, this cluster  
582 includes both synthetic/therapeutic (nTZDpa, tesaglitazar, telmisartan) and environmental  
583 compounds (allethrin, tributyl phosphate, and TPhP) and is characterized by general up-  
584 regulation of pathways of adipogenic activity. However, quinoxifen and tonalide generate  
585 adipocytes that are phenotypically distinct from adipocytes induced by therapeutics such as  
586 rosiglitazone. Quinoxifen and tonalide induced white adipocyte functions such as increased  
587 lipid accumulation, but in contrast to rosiglitazone, did not induce mitochondrial biogenesis,  
588 energy expenditure or brite adipocyte gene expression.

589  
590 We hypothesize that the differences in adipocyte phenotype that are induced by environmental  
591 PPAR $\gamma$  ligands (e.g. TBBPA, TPhP, quinoxifen, tonalide) result from the conformation that  
592 PPAR $\gamma$  assumes when liganded with these chemicals rather than with therapeutic agents.  
593 These differences in conformation not only determine the efficacy to which PPAR $\gamma$  is activated  
594 but also the transcriptional repertoire (Chrisman et al. 2018). Access to post-translational  
595 modification sites and coregulator binding surfaces depends upon the structure that PPAR $\gamma$   
596 assumes. Furthermore, the white adipogenic, brite/brown adipogenic and insulin sensitizing  
597 activities of PPAR $\gamma$  are regulated separately through differential co-regulator recruitment  
598 (Villanueva et al. 2013) and post-translational modifications,(Choi et al. 2010; Choi et al. 2011)  
599 with ligands having distinct abilities to activate each of PPAR $\gamma$ 's functions. Suites of genes have  
600 been shown to be specifically regulated by the acetylation status of PPAR $\gamma$  (SirT1-  
601 mediated)(Qiang et al. 2012), by the phosphorylation status of PPAR $\gamma$  (ERK/MEK/CDK5-  
602 mediated)(Choi et al. 2010; Wang et al. 2016) and/or by the recruitment of Prdm16 to PPAR $\gamma$   
603 (Seale et al. 2007). Future work will investigate the connections between the phosphorylation  
604 status of PPAR $\gamma$  liganded with environmental PPAR $\gamma$  ligands such as quinoxifen and tonalide,  
605 the recruitment and release of coregulators, and the ability of PPAR $\gamma$  to recruit transcriptional  
606 machinery to specific DNA-binding sites.

607

608 ***Analytical approaches for adipogen characterization***

609

610 In this study, we performed high-throughput, cost-effective transcriptomic screening to profile  
611 adipocytes formed from 3T3-L1 preadipocytes exposed to a panel of compounds of known and  
612 unknown adipogenic impact. Common to toxicogenomic projects, this panel-based study design  
613 allows for characterization of the extent to which each chemical modifies differentiation (in this  
614 case, adipogenesis as related to the change in lipid accumulation). It also supports the  
615 exploration of how subsets of chemicals influence multiple biological processes that determine  
616 the functional status of a cell (in this case, processes that determine white vs. brite  
617 adipogenesis). Exploration of these biological processes allows for the prediction of the  
618 phenotypic impact of previously unclassified compounds, as well as for the characterization of  
619 the heterogeneity of the cellular activity of compounds with similar known phenotypic impact.  
620 Here we have performed both types of analyses: first through the implementation and  
621 application of random forest classification models to identify potential PPAR $\gamma$  activity-modifying  
622 compounds, and second via the recursive clustering of the data to identify and characterize  
623 taxonomic subgroup of known and predicted PPAR $\gamma$  activity modifying compounds.

624

625 For both analyses, we introduced amendments to commonly used machine learning  
626 procedures, to improve accuracy and resolution of the acquired result. For the classification  
627 task, we amended the random forest algorithm to tailor it to study designs typically adopted in  
628 toxicogenomic projects (see Methods). With the addition of an extra step to average the  
629 expression across replicates of the bootstrapped samples, we observe consistently higher  
630 performance across conventional metrics than with the standard algorithm (Figure S1). For the  
631 clustering task, we employ a procedure where we recursively divide sets of chemicals into two  
632 subgroups and assess the robustness of each division, as well as annotate transcriptional  
633 drivers of each division. As a result, we are not limited to interpreting the clustering results as  
634 mutually exclusive groups, but rather as a taxonomy of subgroups where sets of compounds  
635 share some transcriptional impact and differ in others, as is expected given the dynamic nature  
636 of the modifications by which compounds directly and indirectly affect PPAR $\gamma$  activity.

637

638 Future work will generalize random forest method to incorporate more complex study designs.  
639 To this end, the classification approach adopted in this project is being developed as a random  
640 forest software tool soon to be made available as an R package, allowing for the interchanging  
641 independent functions at different steps of the algorithm. The strength and utility of this  
642 approach extends beyond toxicogenomic studies, and can be used in a variety of applications of  
643 high-throughput screening, including drug discovery, such as the Connectivity Map (CMAP)  
644 (Subramanian et al. 2017), and longitudinal molecular epidemiology studies, such as the  
645 Framingham Heart Study (Mahmood et al. 2014).

646

## 647 **Conclusions**

648 Emerging data implicate contributions of environmental metabolism-disrupting chemicals to  
649 perturbations of pathways related to metabolic disease pathogenesis, such as disruptions in  
650 insulin signaling and mitochondrial activity. There is still a gap in identifying and examining how  
651 environmental chemicals can act as obesity-inducing and metabolism-disrupting chemicals. Our  
652 implementation of novel strategies for classification and taxonomy development can help

653 identify environmental chemicals that are acting on PPAR $\gamma$ . Further, our approach provides a  
654 basis from which to investigate effects of adipogens on not just the generation of adipocytes, but  
655 potentially pathological changes in their function. To this end, we have shown how two  
656 environmental contaminants, quinoxifen and tonalide, are inducers of white adipogenesis.  
657

658 **References:**

- 659 Auerbach S, Filer D, Reif D, Walker V, Holloway AC, Schlezinger J, et al. 2016. Prioritizing  
660 environmental chemicals for obesity and diabetes outcomes research: A screening approach  
661 using toxcast high-throughput data. *Environ Health Perspect* 124:1141-1154.
- 662 Banks AS, McAllister FE, Camporez JP, Zushin PJ, Jurczak MJ, Laznik-Bogoslavski D, et al.  
663 2015. An erk/cdk5 axis controls the diabetogenic actions of ppargamma. *Nature* 517:391-395.
- 664 Benton CR, Holloway GP, Campbell SE, Yoshida Y, Tandon NN, Glatz JF, et al. 2008.  
665 Rosiglitazone increases fatty acid oxidation and fatty acid translocase (fat/cd36) but not  
666 carnitine palmitoyltransferase i in rat muscle mitochondria. *J Physiol* 586:1755-1766.
- 667 Berger J, Bailey P, Biswas C, Cullinan CA, Doebber TW, Hayes NS, et al. 1996.  
668 Thiazolidinediones produce a conformational change in peroxisomal proliferator-activated  
669 receptor-gamma: Binding and activation correlate with antidiabetic actions in db/db mice.  
670 *Endocrinology* 137:4189-4195.
- 671 Burgermeister E, Schnoebelen A, Flament A, Benz J, Stihle M, Gsell B, et al. 2006. A novel  
672 partial agonist of peroxisome proliferator-activated receptor-gamma (ppargamma) recruits  
673 ppargamma-coactivator-1alpha, prevents triglyceride accumulation, and potentiates insulin  
674 signaling in vitro. *Mol Endocrinol* 20:809-830.
- 675 Choi JH, Banks AS, Estall JL, Kajimura S, Bostrom P, Laznik D, et al. 2010. Anti-diabetic drugs  
676 inhibit obesity-linked phosphorylation of ppargamma by cdk5. *Nature* 466:451-456.
- 677 Choi JH, Banks AS, Kamenecka TM, Busby SA, Chalmers MJ, Kumar N, et al. 2011.  
678 Antidiabetic actions of a non-agonist ppargamma ligand blocking cdk5-mediated  
679 phosphorylation. *Nature* 477:477-481.
- 680 Chrisman IM, Nemetcheck MD, de Vera IMS, Shang J, Heidari Z, Long Y, et al. 2018. Defining a  
681 conformational ensemble that directs activation of ppargamma. *Nat Commun* 9:1794.
- 682 Claussnitzer M, Dankel SN, Kim KH, Quon G, Meuleman W, Haugen C, et al. 2015. Fto obesity  
683 variant circuitry and adipocyte browning in humans. *The New England journal of medicine*  
684 373:895-907.
- 685 Collaborators GBoDO, Afshin A, Forouzanfar MH, Reitsma MB, Sur P, Estep K, et al. 2017.  
686 Health effects of overweight and obesity in 195 countries over 25 years. *The New England*  
687 *journal of medicine* 377:13-27.
- 688 Duncan H, Abad-Somovilla A, Abad-Fuentes A, Agullo C, Mercader JV. 2018. Immunochemical  
689 rapid determination of quinoxifen, a priority hazardous pollutant. *Chemosphere* 211:302-307.
- 690 Fang M, Webster TF, Ferguson PL, Stapleton HM. 2015. Characterizing the peroxisome  
691 proliferator-activated receptor (ppargamma) ligand binding potential of several major flame  
692 retardants, their metabolites, and chemical mixtures in house dust. *Environ Health Perspect*  
693 123:166-172.
- 694 Farmer SR. 2006. Transcriptional control of adipocyte formation. *Cell metabolism* 4:263-273.
- 695 Feige JN, Gelman L, Rossi D, Zoete V, Metivier R, Tudor C, et al. 2007. The endocrine  
696 disruptor monoethyl-hexyl-phthalate is a selective peroxisome proliferator-activated receptor  
697 gamma modulator that promotes adipogenesis. *J Biol Chem* 282:19152-19166.
- 698 Gumbilai V, Ebihara K, Aizawa-Abe M, Ebihara C, Zhao M, Yamamoto Y, et al. 2016. Fat mass  
699 reduction with adipocyte hypertrophy and insulin resistance in heterozygous ppargamma mutant  
700 rats. *Diabetes* 65:2954-2965.

- 701 He W, Barak Y, Hevener A, Olson P, Liao D, Le J, et al. 2003. Adipose-specific peroxisome  
702 proliferator-activated receptor gamma knockout causes insulin resistance in fat and liver but not  
703 in muscle. *Proc Natl Acad Sci U S A* 100:15712-15717.
- 704 Heindel JJ, Blumberg B, Cave M, Machtinger R, Mantovani A, Mendez MA, et al. 2017.  
705 Metabolism disrupting chemicals and metabolic disorders. *Reproductive toxicology* (Elmsford,  
706 NY 68:3-33.
- 707 HERA. 2004. Human & environmental risk assessment on ingredients of household cleaning  
708 products: Polycyclic musks. Available: [https://www.heraproject.com/files/29-E-](https://www.heraproject.com/files/29-E-04_pcm_HHCB_AHTN_HERA_Environmenta_DISCLed26.pdf)  
709 [04\\_pcm\\_HHCB\\_AHTN\\_HERA\\_Environmenta\\_DISCLed26.pdf](https://www.heraproject.com/files/29-E-04_pcm_HHCB_AHTN_HERA_Environmenta_DISCLed26.pdf) [accessed Dec. 27 2018].
- 710 Huber J, Loffler M, Bilban M, Reimers M, Kadl A, Todoric J, et al. 2007. Prevention of high-fat  
711 diet-induced adipose tissue remodeling in obese diabetic mice by n-3 polyunsaturated fatty  
712 acids. *International journal of obesity* (2005) 31:1004-1013.
- 713 Ito M, Nagasawa M, Hara T, Ide T, Murakami K. 2010. Differential roles of cidea and cidec in  
714 insulin-induced anti-apoptosis and lipid droplet formation in human adipocytes. *Journal of lipid*  
715 *research* 51:1676-1684.
- 716 Janesick AS, Dimastrogiovanni G, Vanek L, Boulous C, Chamorro-Garcia R, Tang W, et al. 2016.  
717 On the utility of toxcast and toxpi as methods for identifying new obesogens. *Environ Health*  
718 *Perspect* 124:1214-1226.
- 719 Jiang Y, Berry DC, Tang W, Graff JM. 2014. Independent stem cell lineages regulate adipose  
720 organogenesis and adipose homeostasis. *Cell Rep* 9:1007-1022.
- 721 Kannan K, Reiner JL, Yun SH, Perrotta EE, Tao L, Johnson-Restrepo B, et al. 2005. Polycyclic  
722 musk compounds in higher trophic level aquatic organisms and humans from the united states.  
723 *Chemosphere* 61:693-700.
- 724 Kavlock R, Chandler K, Houck K, Hunter S, Judson R, Kleinstreuer N, et al. 2012. Update on  
725 epa's toxcast program: Providing high throughput decision support tools for chemical risk  
726 management. *Chem Res Toxicol* 25:1287-1302.
- 727 Kim S, Li A, Monti S, Schlezinger JJ. 2018. Tributyltin induces a transcriptional response without  
728 a brite adipocyte signature in adipocyte models. *Arch Toxicol*.
- 729 Kusminski CM, Bickel PE, Scherer PE. 2016. Targeting adipose tissue in the treatment of  
730 obesity-associated diabetes. *Nat Rev Drug Discov* 15:639-660.
- 731 Leek JT, Johnson WE, Parker HS, Jaffe AE, Storey JD. 2012. The sva package for removing  
732 batch effects and other unwanted variation in high-throughput experiments. *Bioinformatics*  
733 (Oxford, England) 28:882-883.
- 734 Marcon BH, Holetz FB, Eastman G, Origa-Alves AC, Amoros MA, de Aguiar AM, et al. 2017.  
735 Downregulation of the protein synthesis machinery is a major regulatory event during early  
736 adipogenic differentiation of human adipose-derived stromal cells. *Stem Cell Res* 25:191-201.
- 737 O'Donnell PE, Ye XZ, DeChellis MA, Davis VM, Duan SZ, Mortensen RM, et al. 2016.  
738 Lipodystrophy, diabetes and normal serum insulin in ppargamma-deficient neonatal mice. *PLoS*  
739 *one* 11:e0160636.
- 740 Ohno H, Shinoda K, Spiegelman BM, Kajimura S. 2012. Ppargamma agonists induce a white-  
741 to-brown fat conversion through stabilization of prdm16 protein. *Cell metabolism* 15:395-404.
- 742 Park YW, Zhu S, Palaniappan L, Heshka S, Carnethon MR, Heymsfield SB. 2003. The  
743 metabolic syndrome: Prevalence and associated risk factor findings in the us population from



- 744 the third national health and nutrition examination survey, 1988-1994. *Arch Intern Med* 163:427-  
745 436.
- 746 Pereira-Fernandes A, Demaegdt H, Vandermeiren K, Hectors TL, Jorens PG, Blust R, et al.  
747 2013. Evaluation of a screening system for obesogenic compounds: Screening of endocrine  
748 disrupting compounds and evaluation of the ppar dependency of the effect. *PloS one* 8:e77481.
- 749 Pfaffl MW. 2001. A new mathematical model for relative quantification in real-time rt-pcr. *Nucleic*  
750 *acids research* 29:e45.
- 751 Puigserver P, Wu Z, Park CW, Graves R, Wright M, Spiegelman BM. 1998. A cold-inducible  
752 coactivator of nuclear receptors linked to adaptive thermogenesis. *Cell* 92:829-839.
- 753 Qiang L, Wang L, Kon N, Zhao W, Lee S, Zhang Y, et al. 2012. Brown remodeling of white  
754 adipose tissue by sirt1-dependent deacetylation of ppargamma. *Cell* 150:620-632.
- 755 Regnier SM, El-Hashani E, Kamau W, Zhang X, Massad SL, Sargis RM. 2015. Tributyltin  
756 differentially promotes development of a phenotypically distinct adipocyte. *Obesity* (Silver  
757 Spring, Md In press.
- 758 Ritchie ME, Phipson B, Wu D, Hu Y, Law CW, Shi W, et al. 2015. Limma powers differential  
759 expression analyses for rna-sequencing and microarray studies. *Nucleic acids research* 43:e47.
- 760 Riu A, Grimaldi M, le Maire A, Bey G, Phillips K, Boulahtouf A, et al. 2011. Peroxisome  
761 proliferator-activated receptor gamma is a target for halogenated analogs of bisphenol a.  
762 *Environ Health Perspect* 119:1227-1232.
- 763 Rosen ED, Spiegelman BM. 2006. Adipocytes as regulators of energy balance and glucose  
764 homeostasis. *Nature* 444:847-853.
- 765 Schlezinger J. 2018. Environmental ppar ligands: Inducers of white, but not brite,  
766 adipogenesis. In: *The Toxicologist: Supplement to Toxicological Sciences*, Vol. 162 (1), Abstract  
767 no. 1659.
- 768 Schwartz MW, Seeley RJ, Zeltser LM, Drewnowski A, Ravussin E, Redman LM, et al. 2017.  
769 Obesity pathogenesis: An endocrine society scientific statement. *Endocr Rev* 38:267-296.
- 770 Seale P, Kajimura S, Yang W, Chin S, Rohas LM, Uldry M, et al. 2007. Transcriptional control of  
771 brown fat determination by prdm16. *Cell metabolism* 6:38-54.
- 772 Shoucri BM, Hung VT, Chamorro-Garcia R, Shioda T, Blumberg B. 2018. Retinoid x receptor  
773 activation during adipogenesis of female mesenchymal stem cells programs a dysfunctional  
774 adipocyte. *Endocrinology* 159:2863-2883.
- 775 Sidossis L, Kajimura S. 2015. Brown and beige fat in humans: Thermogenic adipocytes that  
776 control energy and glucose homeostasis. *J Clin Invest* 125:478-486.
- 777 Soukas A, Socci ND, Saatkamp BD, Novelli S, Friedman JM. 2001. Distinct transcriptional  
778 profiles of adipogenesis in vivo and in vitro. *J Biol Chem* 276:34167-34174.
- 779 Team RC. 2013. R: A language and environment for statistical computing. R Foundation For  
780 Statistical Computing.
- 781 Timmons JA, Pedersen BK. 2009. The importance of brown adipose tissue. *The New England*  
782 *journal of medicine* 361:415-416; author reply 418-421.
- 783 Tontonoz P, Hu. E, Spiegelman BM. 1994. Stimulation of adipogenesis in fibroblasts by ppar $\gamma$ 2,  
784 a lipid-activated transcription factor. *Cell* 79:1147-1156.

785 Villanueva CJ, Vergnes L, Wang J, Drew BG, Hong C, Tu Y, et al. 2013. Adipose subtype-  
786 selective recruitment of tle3 or prdm16 by ppargamma specifies lipid storage versus  
787 thermogenic gene programs. *Cell metabolism* 17:423-435.

788 Wang H, Liu L, Lin JZ, Aprahamian TR, Farmer SR. 2016. Browning of white adipose tissue  
789 with roscovitine induces a distinct population of ucp1+ adipocytes. *Cell metabolism* 24:835-847.

790 Xiong Y, Soumillon M, Wu J, Hansen J, Hu B, van Hasselt JGC, et al. 2017. A comparison of  
791 mrna sequencing with random primed and 3'-directed libraries. *Sci Rep* 7:14626.

792 Zhang J, Fu M, Cui T, Xiong C, Xu K, Zhong W, et al. 2004. Selective disruption of ppargamma  
793 2 impairs the development of adipose tissue and insulin sensitivity. *Proc Natl Acad Sci U S A*  
794 101:10703-10708.

795

796

797

798 **Tables:**

799

800 **Table 1.** Amended random forest classification results for 17 compounds suspected to be

801 PPAR $\gamma$  modifiers.

| CHEMICAL NAME                                         | KNOWN SOURCE/USE             | PPARY MODIFIER VOTE $\pm$ 95% CI |
|-------------------------------------------------------|------------------------------|----------------------------------|
| <b>CHEMICALS ABOVE THE HIGHEST F1-SCORE THRESHOLD</b> |                              |                                  |
| D-CIS,TRANS-ALLETHRIN                                 | Insecticide                  | 0.91 $\pm$ 0.01                  |
| TONALIDE                                              | Musk (fragrance)             | 0.90 $\pm$ 0.01                  |
| QUINOXYFEN                                            | Fungicide                    | 0.90 $\pm$ 0.01                  |
| FENTHION                                              | Insecticide                  | 0.88 $\pm$ 0.01                  |
| 2,4,6-TRIS(TERT-BUTYL)PHENOL                          | Antioxidant (industrial)     | 0.80 $\pm$ 0.02                  |
| PRALLETHRIN                                           | Insecticide                  | 0.78 $\pm$ 0.02                  |
| TEBUCONAZOLE                                          | Fungicide                    | 0.78 $\pm$ 0.02                  |
| FLUDIOXONIL                                           | Fungicide                    | 0.77 $\pm$ 0.02                  |
| TRIS(1,3-DICHLORO-2-PROPYL) PHOSPHATE                 | Flame retardant              | 0.76 $\pm$ 0.02                  |
| CYAZOFAMID                                            | Pesticide                    | 0.72 $\pm$ 0.02                  |
| PERFLUOROOCCTANOIC ACID                               | Fluorosurfactant             | 0.59 $\pm$ 0.02                  |
| TRIPHENYL PHOSPHITE                                   | Pesticide                    | 0.57 $\pm$ 0.02                  |
| TRIS(1-CHLORO-2-PROPYL) PHOSPHATE                     | Flame retardant              | 0.54 $\pm$ 0.02                  |
| <b>CHEMICALS BELOW THE HIGHEST F1-SCORE THRESHOLD</b> |                              |                                  |
| TRIPHENYLPHOSPHINE OXIDE                              | Crystallizing aid, byproduct | 0.49 $\pm$ 0.02                  |
| DIPHENYL PHOSPHATE                                    | Metabolite of TPhP           | 0.47 $\pm$ 0.02                  |
| DIOCTYL SULFOSUCCINATE SODIUM                         | Surfactant                   | 0.41 $\pm$ 0.02                  |
| PERFLUOROOCCTANESULFONIC ACID                         | Fluorosurfactant             | 0.40 $\pm$ 0.02                  |

802

803

804

805

806

807

808

809

810

811

812

813

814

815

816

817

## 818 **Figure Legends:**

819 **Figure 1.** Lipid accumulation in differentiated and treated 3T3-L1 pre-adipocytes.  
820 3T3-L1 cells were cultured with adipocyte differentiation medium and treated with vehicle (Vh,  
821 0.1% DMSO, final concentration) or test chemical (Table S1). On days 3, 5, and 7 of  
822 differentiation, the medium was replaced and the cultures re-dosed. Following 10 days of  
823 differentiation and dosing, cells were analyzed for lipid accumulation by Nile Red staining. Data  
824 are presented as mean  $\pm$  SE (n=4). \* Statistically different from Vh-treated (highlighted in  
825 green)( $p < 0.05$ , ANOVA, Dunnett's).

826  
827 **Figure 2.** Amended random forest classification performance and gene importance of final  
828 classification model.  
829 **(A)** Performance of random forest classification procedure based on 10-fold cross validation. **(B)**  
830 Gini Importance versus ranking of genes used in the final random forest model. The names of  
831 the top 2 genes are highlighted. Compound-specific gene expression of *Rpl13* and *Cidec* are  
832 shown in supplementary figure 2.

833  
834 **Figure 3.** Chemical taxonomy of PPAR $\gamma$ -modifying compounds based on K2 clustering of the  
835 3'DGE data. The dendrogram shows the taxonomy-driven hierarchical grouping of compounds  
836 and naive exposures of 3T3-L1 cells. Each split is labeled with a letter, and the proportion of  
837 gene-level bootstraps which produced the resulting split is shown. Highlights of hyper-  
838 enrichment of gene ontology (GO) biological processes are shown.

839  
840 **Figure 4.** White and brite gene expression in differentiated and treated 3T3-L1 adipocytes.  
841 3T3-L1 cells were cultured with adipocyte differentiation medium and dosed with Vh (0.1%  
842 DMSO, final concentration), rosiglitazone (Rosig, 1  $\mu$ M), roscovitine (Rosco, 4  $\mu$ M), 15dPGJ2 (1  
843  $\mu$ M), TBBPA (20  $\mu$ M) and TPhP (10  $\mu$ M). On days 3, 5, and 7 of differentiation, the adipocyte  
844 maintenance medium was replaced and the cultures re-dosed. Following 10 days of  
845 differentiation and dosing, cells were analyzed for gene expression by RT-qPCR. **(A)** PPAR $\gamma$   
846 and coregulator expression. **(B)** Genes related to white adipogenesis. **(C)** Genes related to brite  
847 adipogenesis. **(D)** Genes related to mitochondrial biogenesis and energy expenditure. Data are  
848 presented as mean  $\pm$  SE of n=4 independent experiments. Statistically different from Vh-treated  
849 (highlighted in green)(\* $p < 0.05$ , \*\* $p < 0.01$ , ANOVA, Dunnett's).

850  
851 **Figure 5.** Fatty acid uptake in differentiated and treated 3T3-L1 adipocytes.  
852 Differentiation and dosing were carried out as described in Figure 4. Following 10 days of  
853 differentiation, fatty acid uptake was analyzed using a dodecanoic acid fluorescent fatty acid  
854 substrate. Data are presented as means  $\pm$  SE (n=4). Statistically different from Vh-treated  
855 (highlighted in green)(\* $p < 0.05$ , \*\* $p < 0.01$ , ANOVA, Dunnett's).

856  
857 **Figure 6.** Mitochondrial biogenesis in differentiated and treated 3T3-L1 adipocytes.  
858 Differentiation and dosing were carried out as described in Figure 4. Following 10 days of  
859 differentiation, mitochondrial biogenesis was analyzed by measuring mitochondria-specific  
860 proteins. Data are presented as means  $\pm$  SE (n=4). \* Statistically different from Vh-treated  
861 (highlighted in green)( $p < 0.05$ , ANOVA, Dunnett's).

862

863 **Figure 7.** Tonalide and quinoxifen induce white, but not brite, adipogenesis in 3T3-L1 pre-  
864 adipocytes. 3T3-L1 cells were cultured with adipocyte differentiation medium and dosed with Vh  
865 (0.1% DMSO, final concentration), quinoxifen (Quino, 10  $\mu$ M) or tonalide (Tonal, 4  $\mu$ M). On  
866 days 3, 5, and 7 of differentiation, the adipocyte maintenance medium was replaced and the  
867 cultures re-dosed. Following 10 days of differentiation and dosing, cultures were analyzed for  
868 **(A)** adipocyte differentiation, **(B)** white (*Cidec*) and brite (*Cidea*) gene expression, **(C)** fatty acid  
869 uptake, **(D)** mitochondrial biogenesis and **(E)** cellular respiration using the Seahorse assay.  
870 Data are presented as means  $\pm$  SE (n=4). \* Statistically different from Vh-treated (highlighted in  
871 green)(p<0.05, ANOVA, Dunnett's).

872

873 **Figure 8.** Tonalide and quinoxifen induce white, but not brite, adipogenesis in primary human  
874 adipocytes. Primary human adipocytes were differentiation medium and dosed with Vh (0.1%  
875 DMSO, final concentration), quinoxifen (Quino, 4  $\mu$ M) or tonalide (Tonal, 4  $\mu$ M). On days 3, 5,  
876 7, 10, and 12 of differentiation, the medium was replace and the cultures re-dosed. Following 14  
877 days of differentiation and dosing, cultures were analyzed for **(A)** adipocyte differentiation, **(B)**  
878 white (*Cidec*) and brite (*Cidea*) gene expression, **(C)** fatty acid uptake, **(D)** mitochondrial  
879 biogenesis and **(E)** cellular respiration. Data are presented as mean  $\pm$  SE (n=3, each n is from  
880 adipocytes from an individual). \* Statistically different from Vh-treated (highlighted in  
881 green)(p<0.05, ANOVA, Dunnett's).

882

883

884

885

886

887



Figure 1

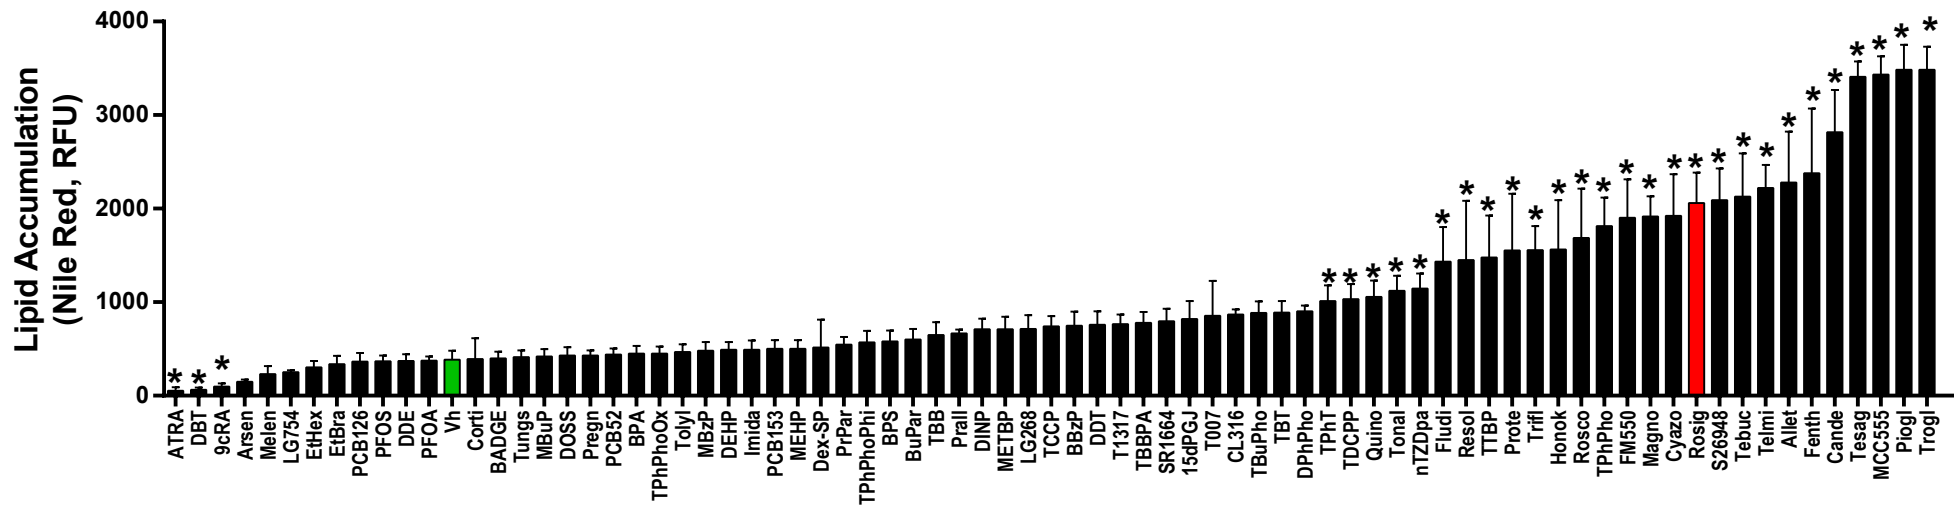

Figure 2

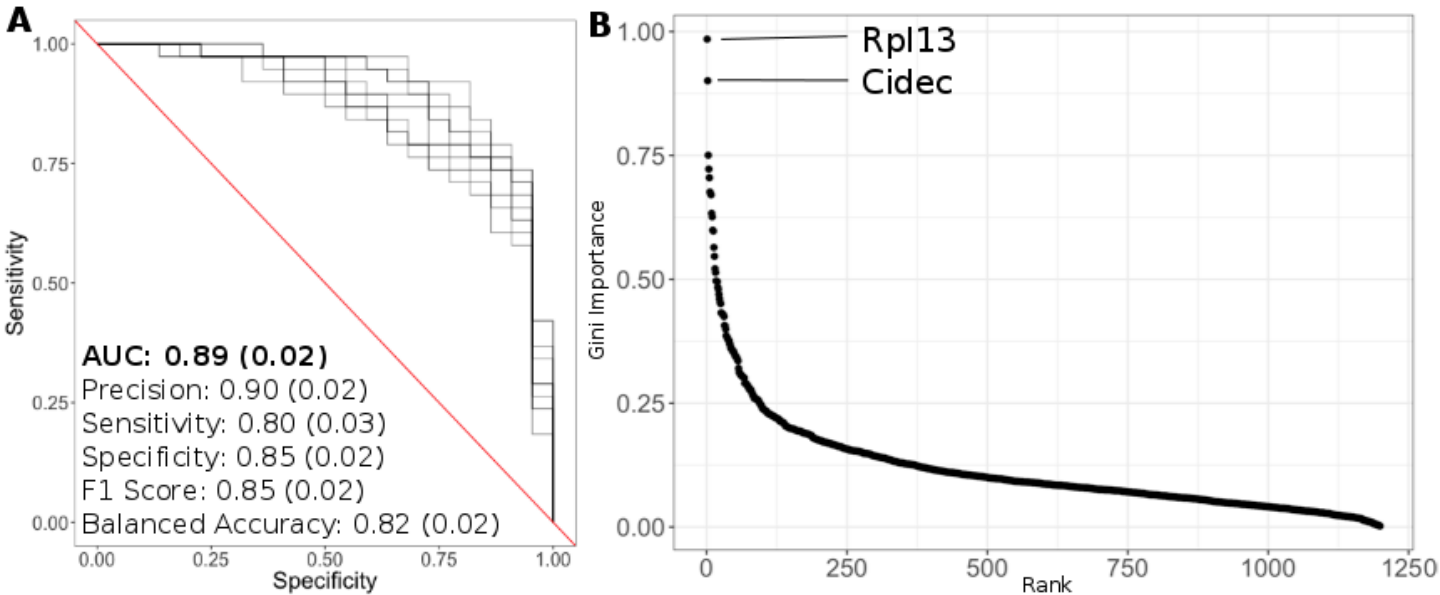

Figure 3

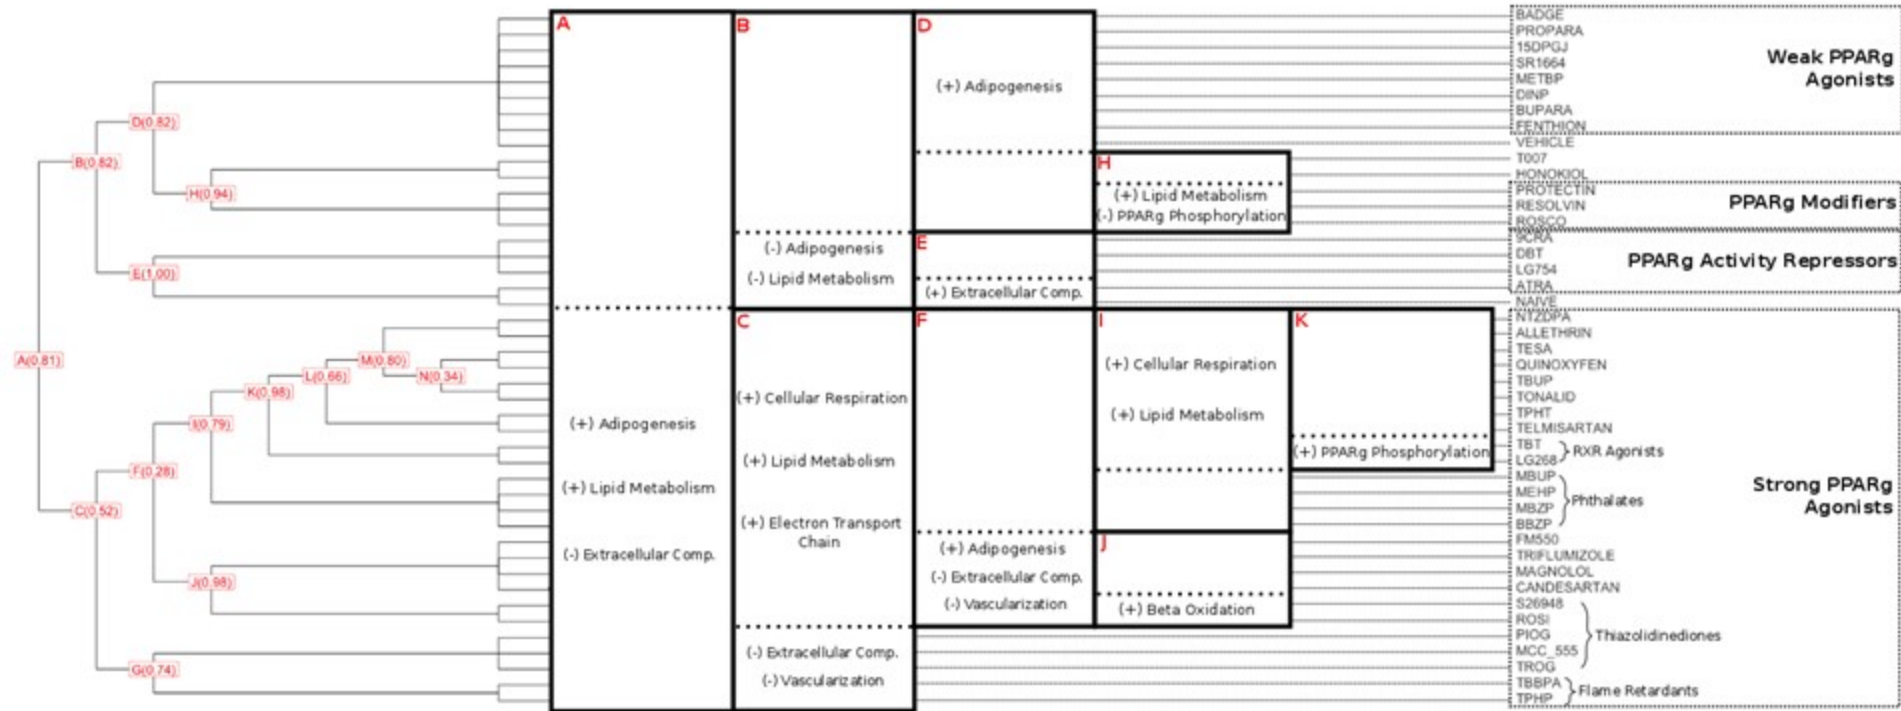

# Figure 4

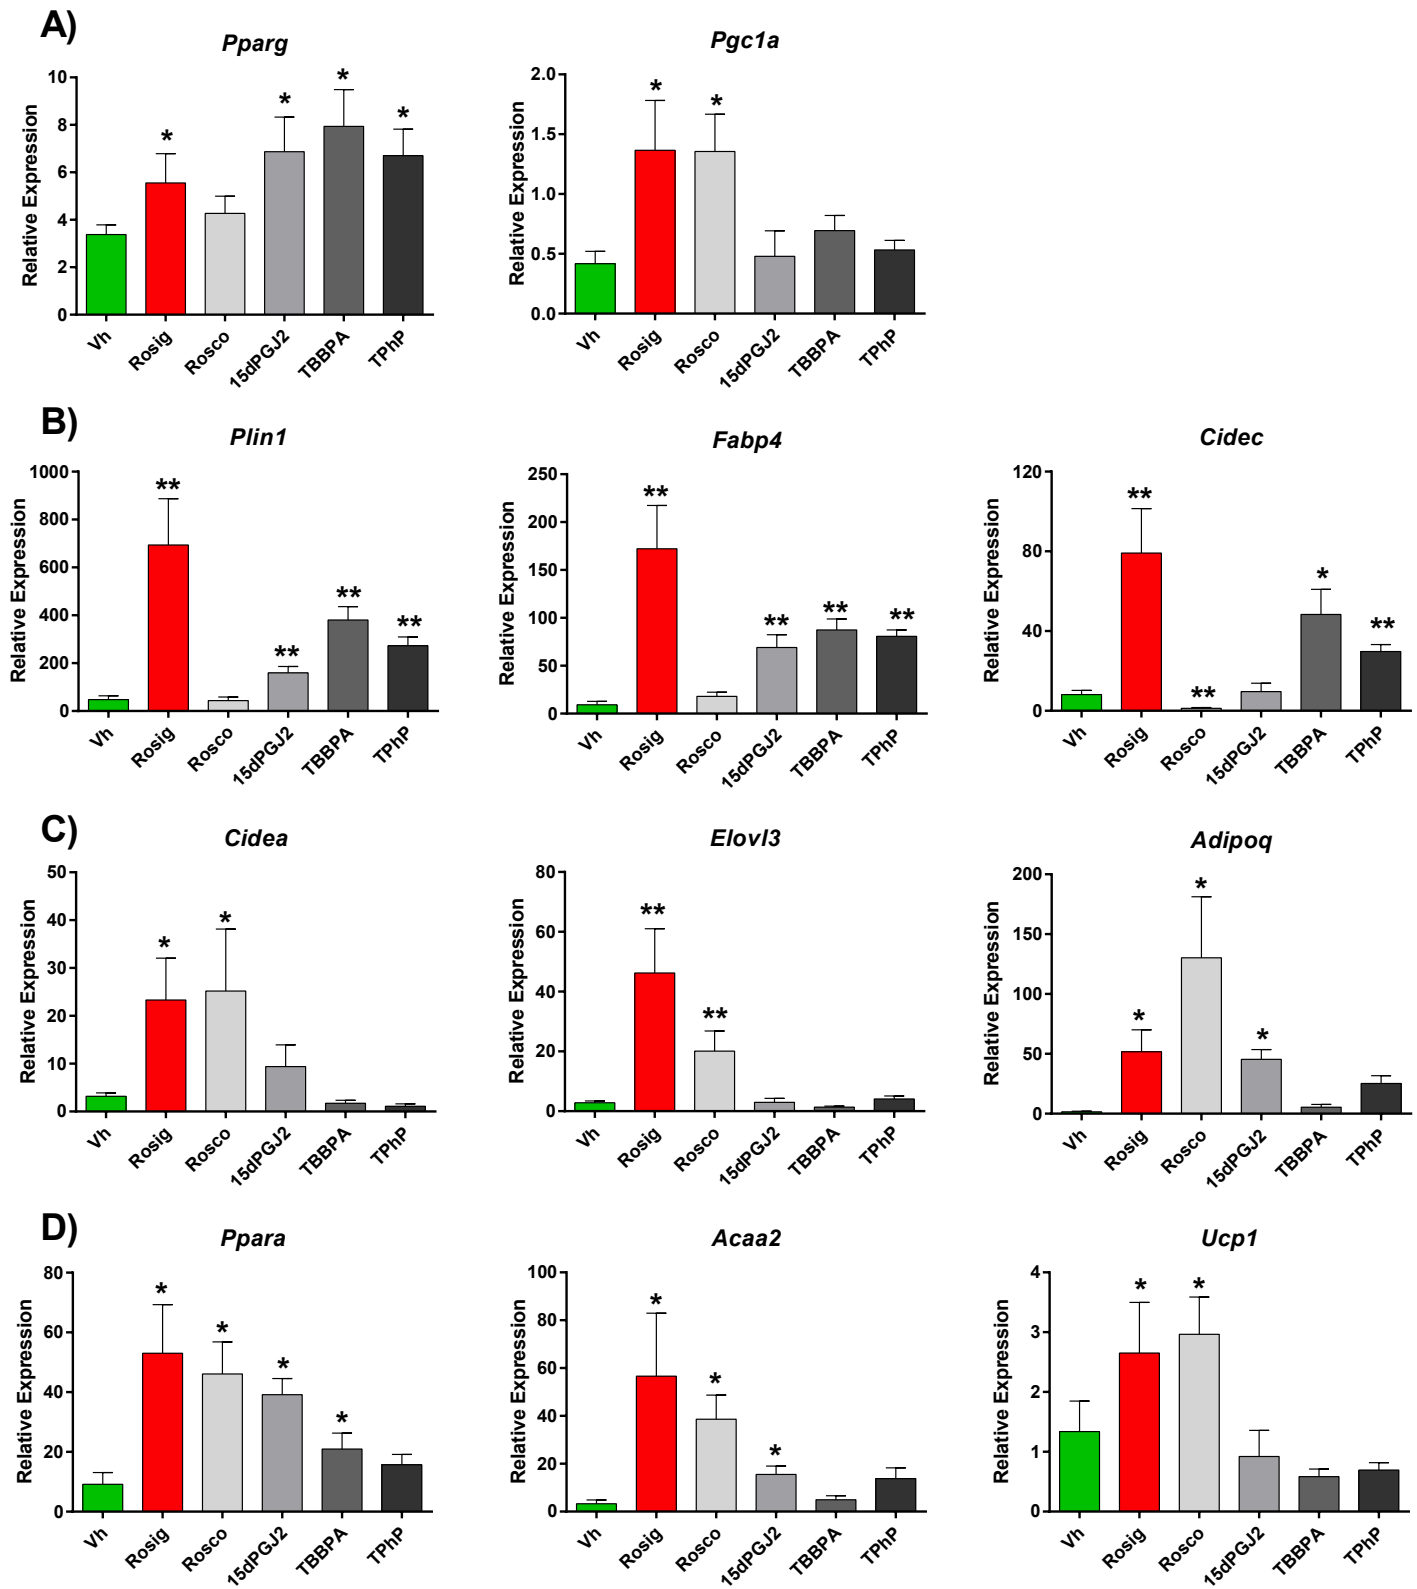

Figure 5

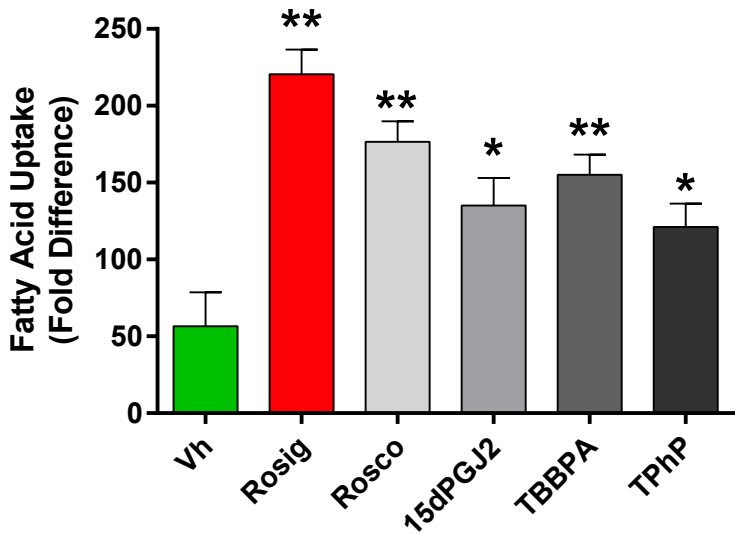



Figure 6

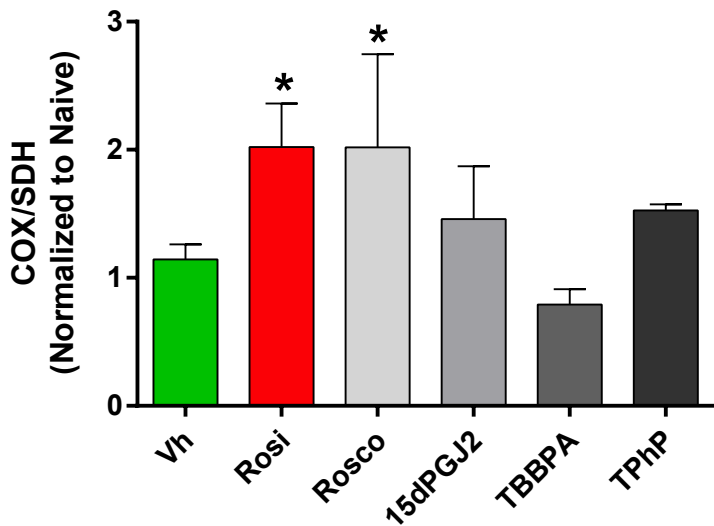

**Figure 7**

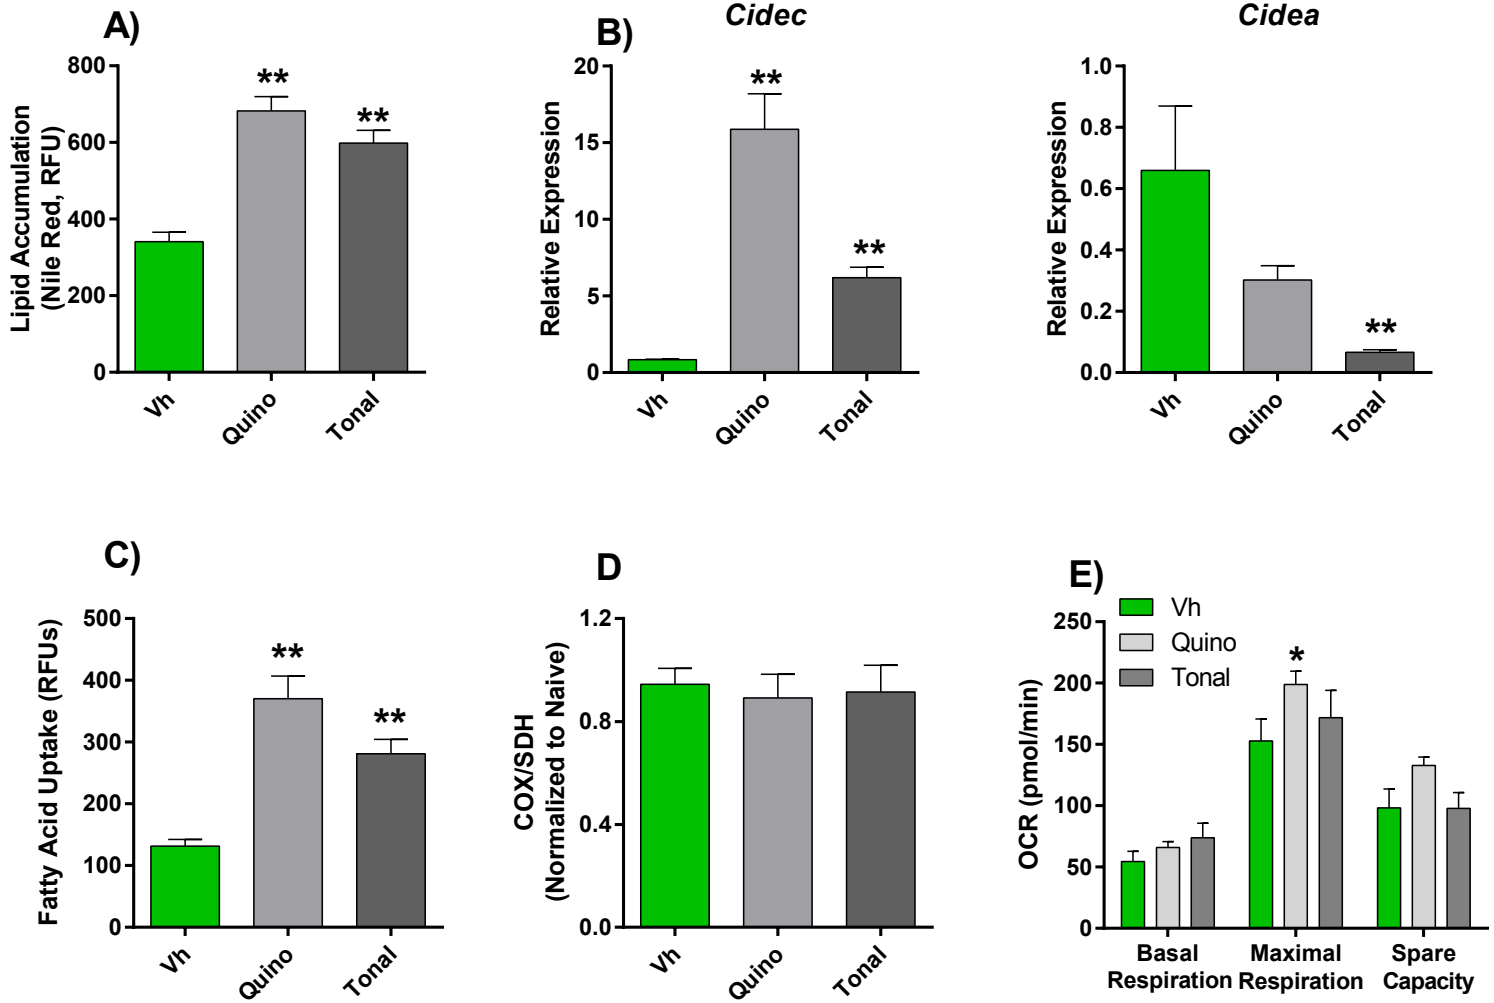

# Figure 8

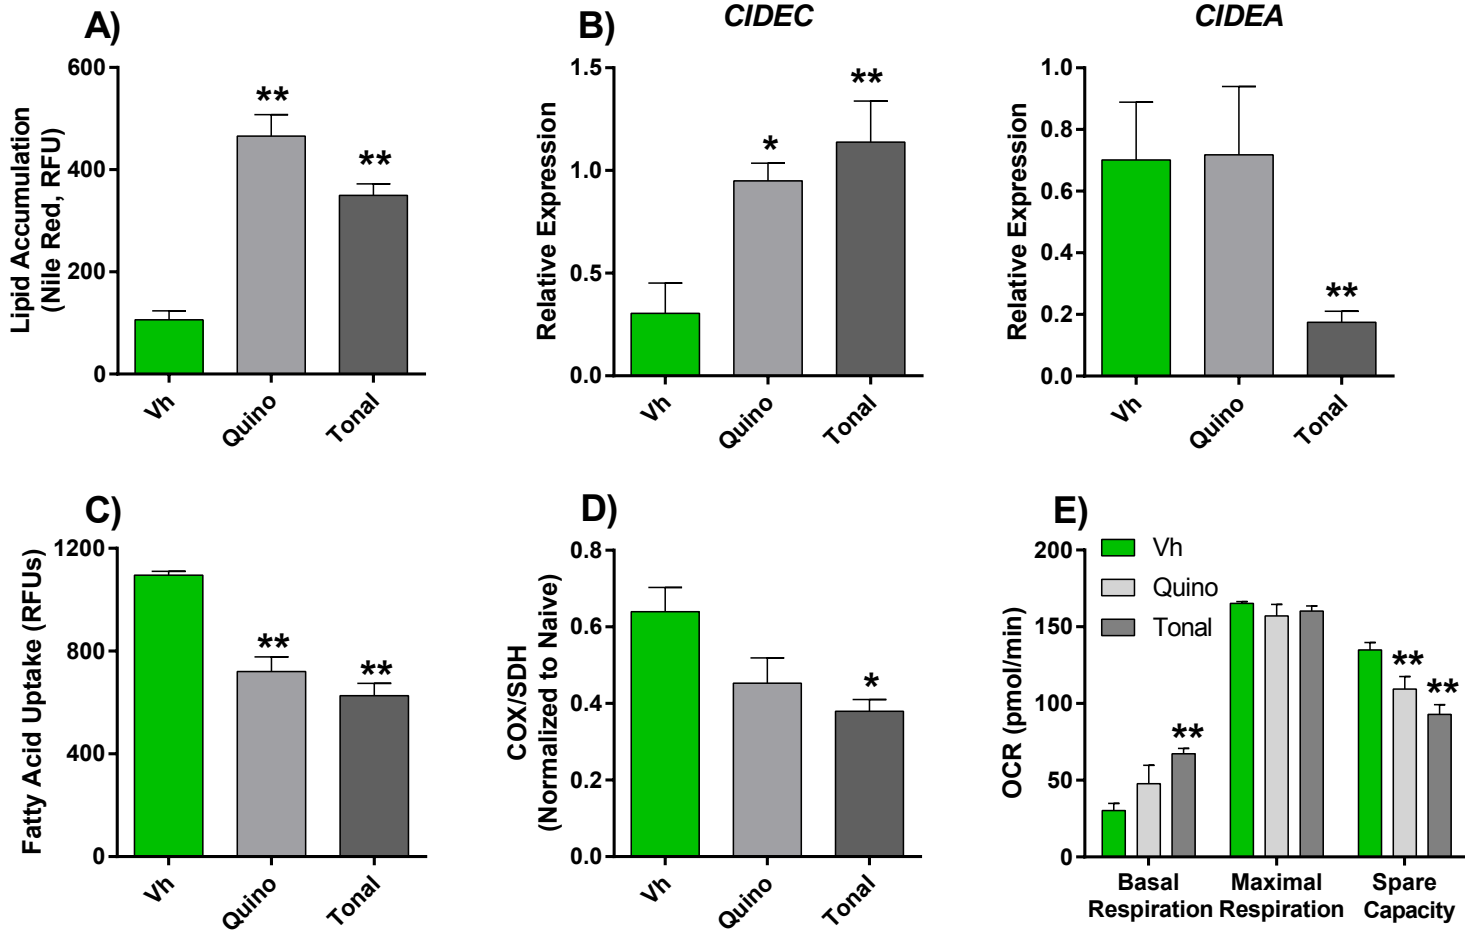

Source: http://biorxiv.org/content/10.1101/519629v2.full.pdf
